# Supplementary material for: Baby Open Brains: An Open-Source Repository of Infant Brain Segmentations
Source: PubMed Central journal article supplement (PMC11507744; doi:10.1101/2024.10.02.616147), 2024-10-14
Supplement: NIHPP2024.10.02.616147v2-supplement-2.pdf [file NIHPP2024.10.02.616147v2-supplement-2.pdf]

**Supplemental Table 1.** No differences were seen on selected neurodevelopmental scores between the participants selected for the BOBs repository and the full BCP sample from which they were selected.

|                                                                     | BOBs           | BCP            | p-value |
|---------------------------------------------------------------------|----------------|----------------|---------|
| Mullen Early Learning Composite Score (SD)                          | 103.09 (12.67) | 104.98 (14.69) | 0.34    |
| Vineland Adaptive Behavior Composite (SD)                           | 96.96 (7.66)   | 99.26 (9.26)   | 0.07    |
| Infant Behavior Questionnaire - Revised: Smiling and Laughing (SD)  | 4.61 (0.98)    | 4.59 (1.10)    | 0.93    |
| Infant Behavior Questionnaire - Revised: Fear (SD)                  | 2.35 (0.82)    | 2.19 (0.82)    | 0.29    |
| Infant Behavior Questionnaire - Revised: Duration of Orienting (SD) | 3.64 (1.12)    | 3.65 (1.11)    | 0.96    |

<sup>^</sup>For the Vineland and IBQ-R, as differences are seen in scores across ages, BOBs participants were compared to only those in the BOBs age range. For the Mullen, the age standardized composite score was used, so BOBs participants were compared to all BCP participants. There were also no differences when just compared between those in the BOBs age range.
